# Supplementary material
Source: PubMed Central journal article supplement (PMC3738835)
Supplement: mmc1.pdf [file mmc1.pdf]

## **Supplemental Data**

### **Mutations in *ZMYND10*, a Gene Essential for Proper Axonemal Assembly of Inner and Outer Dynein Arms in Humans and Flies, Cause Primary Ciliary Dyskinesia**

**Daniel J. Moore, Alexandros Onoufriadis, Amelia Shoemark, Michael A. Simpson, Petra I. zur Lage, Sandra C. de Castro, Lucia Bartoloni, Giuseppe Gallone, Stavroula Petridi, Wesley J. Woollard, Dinu Antony, Miriam Schmidts, Teresa Didonna, Periklis Makrythanasis, Jeremy Bevillard, Nigel P. Mongan, Jana Djakow, Gerard Pals, Jane S. Lucas, June K. Marthin, Kim G. Nielsen, Federico Santoni, Michel Guiponni, Claire Hogg, Stylianos E. Antonarakis, Richard D. Emes, Eddie M.K. Chung, Nicholas D.E. Greene, Jean-Louis Blouin, Andrew P. Jarman, and Hannah M. Mitchison**

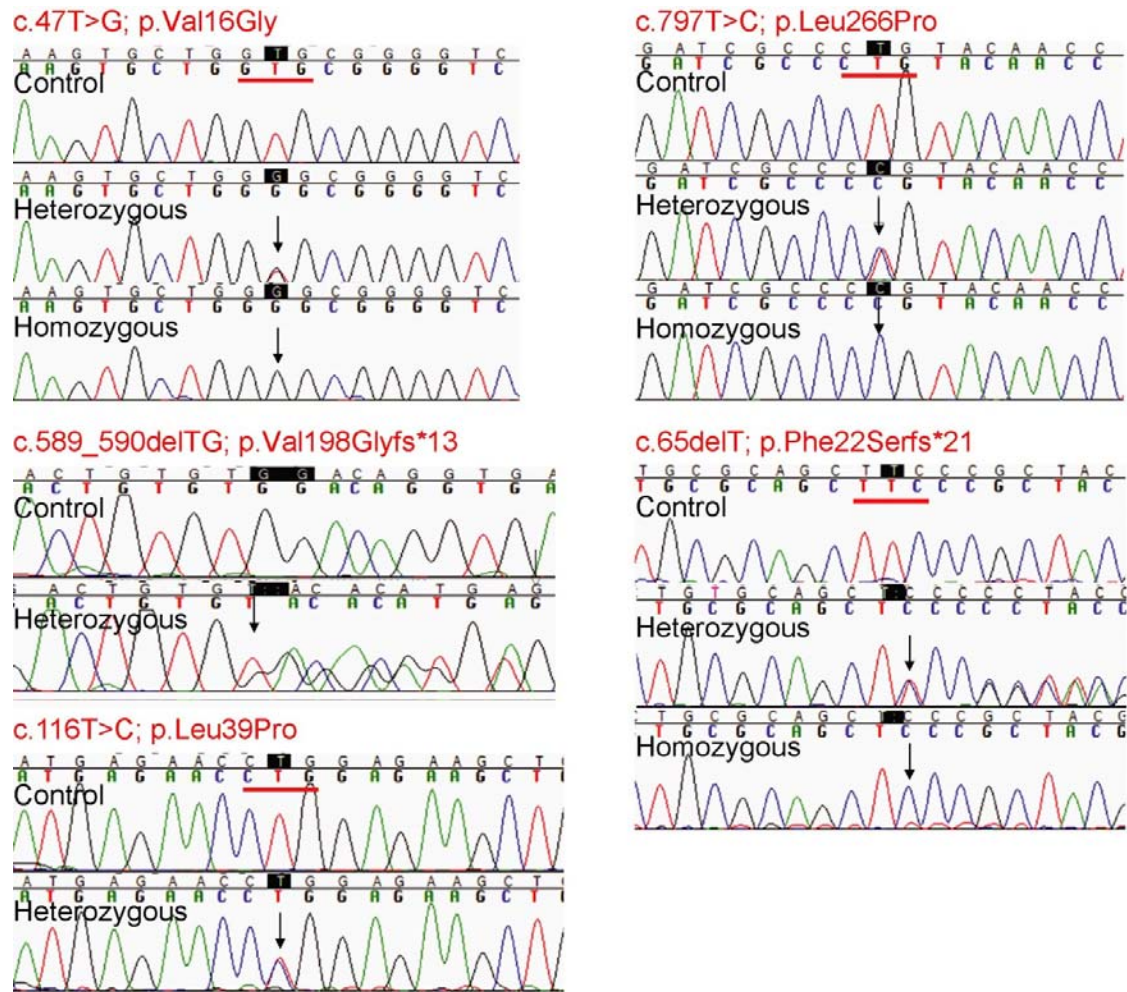

**Figure S1. Sequence Chromatograms of *ZMYND10* Mutations**

Reference genomic sequence amplified from a control individual is shown in comparison to sequence from carrier heterozygote and homozygote affected members representing all five *ZMYND10* mutations identified, with the variants indicated by an arrow.

|                        |                                                                   |
|------------------------|-------------------------------------------------------------------|
| <i>H. sapiens</i>      | -----MGDLEL                                                       |
| <i>M. musculus</i>     | -----MGDLEL                                                       |
| <i>D. rerio</i>        | -----MDSV                                                         |
| <i>X. tropicalis</i>   | -----EAPAPI                                                       |
| <i>D. melanogaster</i> | -----MVNF                                                         |
| <i>T. thermophila</i>  | IGTGHRRGLLYLQYPSYAQS FPLVALNRYQKISQGGYHFSKNLYNVSQQLQNMDSQQQIGDL   |
| <i>T. b. brucei</i>    | -----MEFSGST                                                      |
|                        | <b>p.Val16Gly</b> <b>p.Leu39Pro</b>                               |
| <i>H. sapiens</i>      | LLPGAEVLVRLGRS FPLREMGSEGWNQHENLEKLNMQAILDATVVSQGEPIQELLVTHG      |
| <i>M. musculus</i>     | LLPGAEVLVRLGRS FQLREMGSEGWNKQHESELEKLNMQAILDATISQAEPIQELLINHG     |
| <i>D. rerio</i>        | LLHGAEAGYIQSLEKMSLREIGSPRWFRQHEFIEKLNMQAVLNASANQEEFIKDLFVSLG      |
| <i>X. tropicalis</i>   | LLYGEAEGMVQSLQIFSVRD TASGGWFKQHEYIEKLNMQAILNASAGQEEI IKDLLVTHS    |
| <i>D. melanogaster</i> | VHPPEMYL FVESIRPFVREVSGSKWLEVHEMILGLSQQAELSQRNEEVKFLI SRD         |
| <i>T. thermophila</i>  | LTHYEAHLIEKLIQVNIIEYGSQIWFQKDEILQRLNMQAHVNAVMSDEFIMDSLVTFFD       |
| <i>T. b. brucei</i>    | LSVVVEHTVRLRPFPLQDIGTAEWKNQREAVERLNMCTHSNAVLKDDTVKAFLEIHE         |
|                        | : * : : : : : : * : * : * : : : : :                               |
| <i>H. sapiens</i>      | KVPTLVEELI A VEMWKQKVFPVFCRVEDFKPQNTFPIYMVVHHEAS I INLLETVFFHKEV  |
| <i>M. musculus</i>     | KIPTLVEELI A VEMWKQKVFPVLCRLEDFKPQNTFPIYMVVHHEAS I INLLETVFFHKEV  |
| <i>D. rerio</i>        | KIPTLVHAMILTEVWKHKVFP I ICKLQDFNPKSTFLLYMVIIHHEAT I INLLETIMYHKES |
| <i>X. tropicalis</i>   | KISVLIHELISVEIWKIKVFPVLCQLQDFQPKSTFPLYMVIHHEAT I INLLETIFYHKEV    |
| <i>D. melanogaster</i> | KLRLIHEAYCVTLWKTRVLPHELLEIDPN-PQATFLIYTVLYHEAALVALLDVCVLYHPSG     |
| <i>T. thermophila</i>  | KVKIL IYDLIETE IWKQKVLPLK--NHMLKINTYRSYIAVYHEAVVCNLEEVIMPHRTA     |
| <i>T. b. brucei</i>    | KLPLVLLHELIVMEVWRQVRLPLIK---DQIVQHPAGIYMYVQYEMVLLNLFECIAFHEEV     |
|                        | *: * : :*: :*: * : . * : :* : * : : * :                           |
| <i>H. sapiens</i>      | CESAEDTFLDLDVYCHRKL TLLVAQSGCGGPEGE----GSQDSNPMQELQ---KQAEEL      |
| <i>M. musculus</i>     | CESADDKVLDLDVYCHRKL ILLVARKGGDLSEEE----QFQDSTPMQELQ---KQAEEM      |
| <i>D. rerio</i>        | SEAAGDCVLDLDVYCHRKL TLLVGRSVSGEIPTQDRITHTQISGTASVQDLQ---KQSDM     |
| <i>X. tropicalis</i>   | CESAEDLTLDLDYCHRKL TLLASQSSNMKTLSDRLLSHTASEASSLEELK---QQAES       |
| <i>D. melanogaster</i> | CETLQESVLDLDIDYCAQAI SQVIGLVMGYHENET----KLDVDEAVLTELE---RQKRD     |
| <i>T. thermophila</i>  | VDSADEFLI ELIDYCYRKL VHLTKFPQTKKVKTKT---VEDVLKTRIEEYQ---EQIDD     |
| <i>T. b. brucei</i>    | VVALDEDVLELIDYCWQRSLFAEQNVNEVQSKPTARDVSNAAANTVEEVLKSDRQMLH        |
|                        | : : :*:*** : : : : *                                              |
| <i>H. sapiens</i>      | MEFEIALKALS VLR IYITDCVDSLSTLSRMLSTHNLPCLLVLELLEHSPWSRREGGKQQ     |
| <i>M. musculus</i>     | MEFEISL KALS VLR IYITDCVDSLSTLNRLRTHNLPCLLVLELLEHSPWSRRVGGKQLQ    |
| <i>D. rerio</i>        | LEFEIS I KALS VLCYITDHVESL SLSVLSRMLCTHNMPCVIVQLVENC PWKR---GTQEK |
| <i>X. tropicalis</i>   | LEFDIALKCLSMRYISDHTDSLPLCVTNRLNTHNLPCLLVLELHQCPWTQRQKADME         |
| <i>D. melanogaster</i> | FIYKIGLRCSIVLN IADNVTLFHL SAARRLLVTHDI P WLMADVLSFRPWQRKTSKGIQK   |
| <i>T. thermophila</i>  | IEFKICMVCVSI RIFISDYV KHLVSVVHLLVENDI L CILVPLIEDKFWLRQTSEGERE    |
| <i>T. b. brucei</i>    | AIYQRAMASLSILWFI I DRNLQPLAASNSVLVKNDLI LGLTEVMLLQPWLRRSSEATQK    |
|                        | : . : :*: : * * : : . : * : : : : * : : *                         |
|                        | <b>p.Leu266Pro</b>                                                |
| <i>H. sapiens</i>      | FEGSRWHTVAPSEQ-QKLSKLDGQVWIALYNLLLSPEAQARYCLTSFAKGRLLKLRFLT       |
| <i>M. musculus</i>     | FESGRWQTVAPSEQ-QKLNKLDGQVWIALYNLLLSPEARARYCLTSFAKQLLKLRQFLT       |
| <i>D. rerio</i>        | YTEGKWRVAVLPEDQ-LKLSKHDGQVWIALNLMKLPDCQRKYDFNSSNKTQLLKLGRFLT      |
| <i>X. tropicalis</i>   | YFEDSGIARLLCALSHKSPKLDGQAWITLYNLLLRPECQKYNINSFTKGQLLKLRSFLT       |
| <i>D. melanogaster</i> | FIDEKWTNVDDVTK---IVKPEAQAWFCVRQLLLNPQIMENYAFNEARCKQLHKLGLMH       |
| <i>T. thermophila</i>  | KYENSKWQIVKSEYSKIVKLEANVWIT IYNLFMDPECRKKYELNEFRKSNLLRLRKYMN      |
| <i>T. b. brucei</i>    | FFNGEFKDI PRADV-LLVCTPEAHTWFS LHKLLCDPECRRYSYTSKKEILIRIRHFLN      |
|                        | . : :*: : : * : * : . * . . : : : :                               |
| <i>H. sapiens</i>      | DTLLDQLPNLAHLQSFLAHLTLT----ETQPPKDLVLEQIPEIWERLER--ENRGKWQ        |
| <i>M. musculus</i>     | DTLLDQLPNLADLKGFLAHLSLA----ETQPPKDLVLEQIPEIWRDLER--ENKGKWQ        |
| <i>D. rerio</i>        | DVVIDQLPNLLDKHFLS QLALT----DPVAPKDLILEQLPEIWNIVM--ENDKKWK         |
| <i>X. tropicalis</i>   | EVLLDQLPNLVELQRFSLHLSVS----EPAPPKELIEIQVPEVWDSI IK--ENSGKWK       |
| <i>D. melanogaster</i> | EPLLDQLPPLIELKVFLSRLTSL----GNTAKTQPLLEDIPQIQEELLKDV EENGGFY       |
| <i>T. thermophila</i>  | EIILLDQIPNLSHMLRTLEELS IMNV---QSVPKSNPFIVQQIPEIRENI IK----GKNWN   |
| <i>T. b. brucei</i>    | DTLVDQIPALASLQRALEELSFLQPPSGTEEEKFKSTLTIEQVPRIMTLEVE--RKGSWD      |
|                        | : :*: * * : * : * : . . : :*: : : :                               |
| <i>H. sapiens</i>      | AIAKHQHQHVFSPEQDLRLQA-RRWAETYRLDVLEAVAP-----                      |
| <i>M. musculus</i>     | AIAKHQHQHVFSLEKDLRQQA-QRWAETYRLDVLEAVAP-----                      |
| <i>D. rerio</i>        | AIAKYQVTNVFNPSESELREQA-SRLAQTYNLDVMEALIP-----                     |
| <i>X. tropicalis</i>   | AIAKQVVKHAFSPSEDLRSQAKSRWAQTYNIDVMEALVP-----                      |
| <i>D. melanogaster</i> | QIAQDQDSVFLSKNKENICALA-TRLSKAYGTDLLCELEQNMDLKMGEAKDAGAGGDGD       |
| <i>T. thermophila</i>  | DIAEKQKNEYFVNDKE-TAKQDMQRLADLYGQNIIDGLMEG-----                    |
| <i>T. b. brucei</i>    | DLASTLRAMLQDPSVRNEDAMRLSRI FDEMFSQDLK-----                        |
|                        | :* . . * . : :                                                    |

Figure S2. ZMYND10 Cross-Species Protein Homology

Alignment of the protein sequences encoded by a selected number of *ZMYND10* orthologs is shown indicating (in red) the position of the three amino acids affected by missense variants in patients.

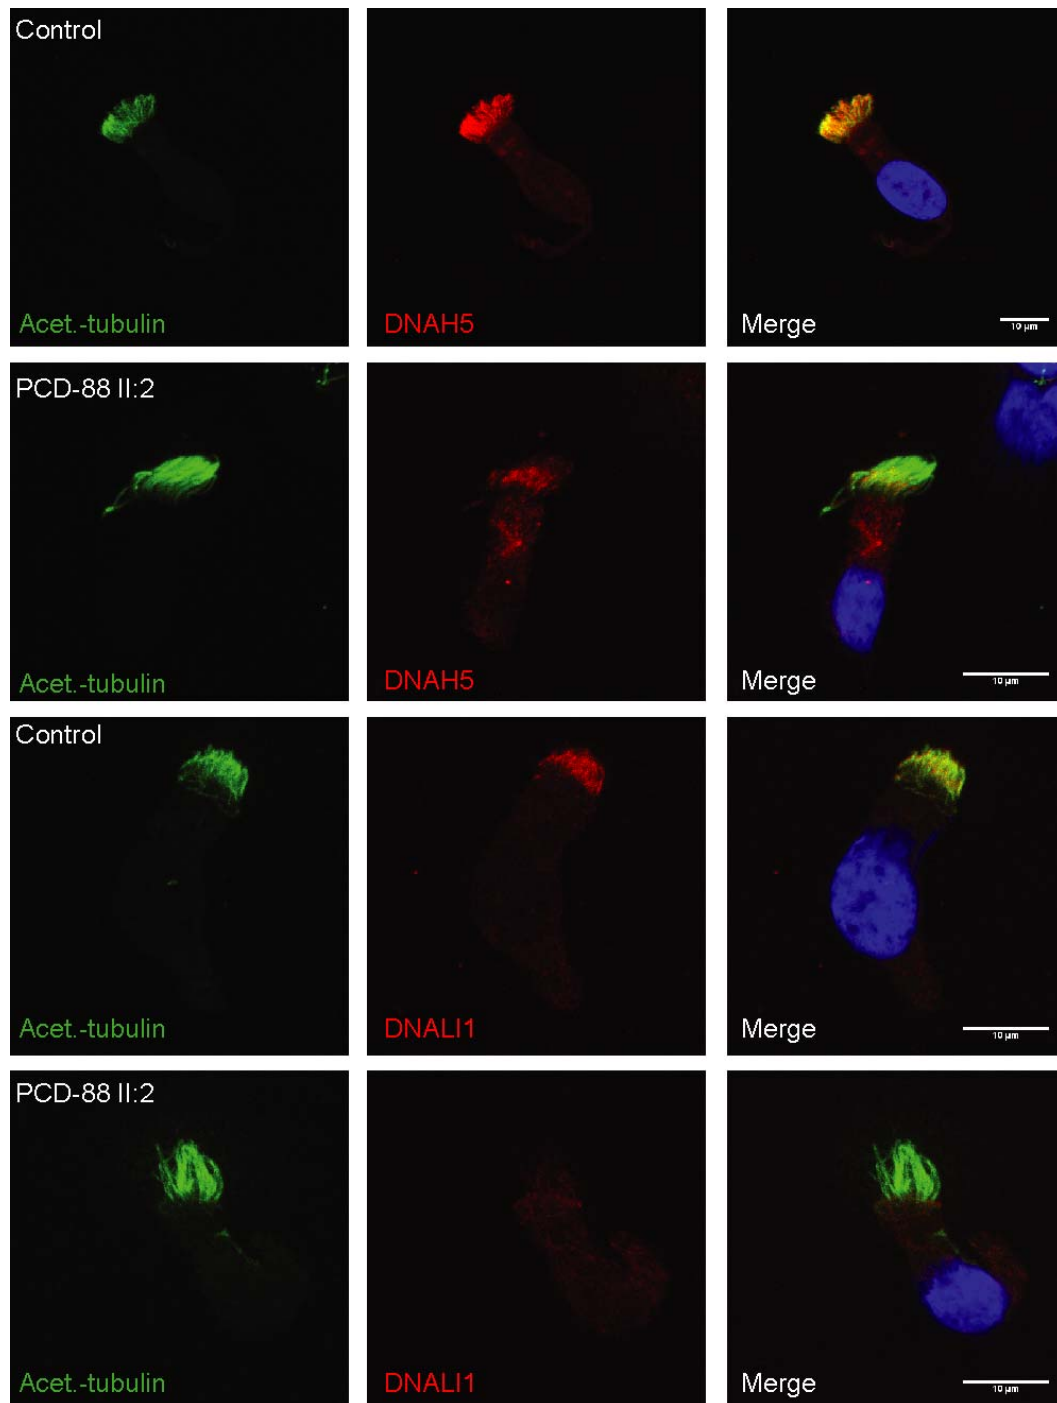

**Figure S3. Loss of Inner and Outer Dynein Arms in UCL-88 II:2**

Cilia axonemal immunostaining was performed using antisera against the ODA protein DNAH5 (Sigma HPA037470) and IDA protein DNALI1 (Sigma HPA028305) in nasal epithelial cells from the UCL-88 II:2 patient. Subcellular localization shows a reduction of

both DNAH5 and DNALI1 in the cilia compared to control (in red). Axoneme-specific staining with anti-acetylated  $\alpha$ -tubulin antibodies (Sigma T-7451) (green) was used as a control, in addition to DNA (DAPI, blue).

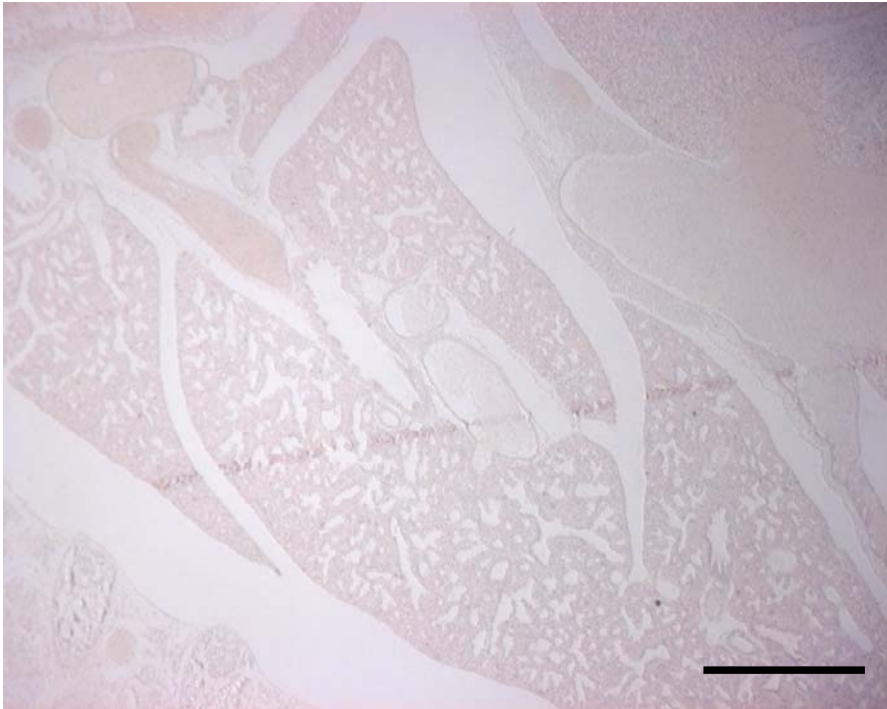

**Figure S4. Mouse Lung Tissue Stained with *Zmynd10* Sense Probe**

Scale bar, 0.5 mm.

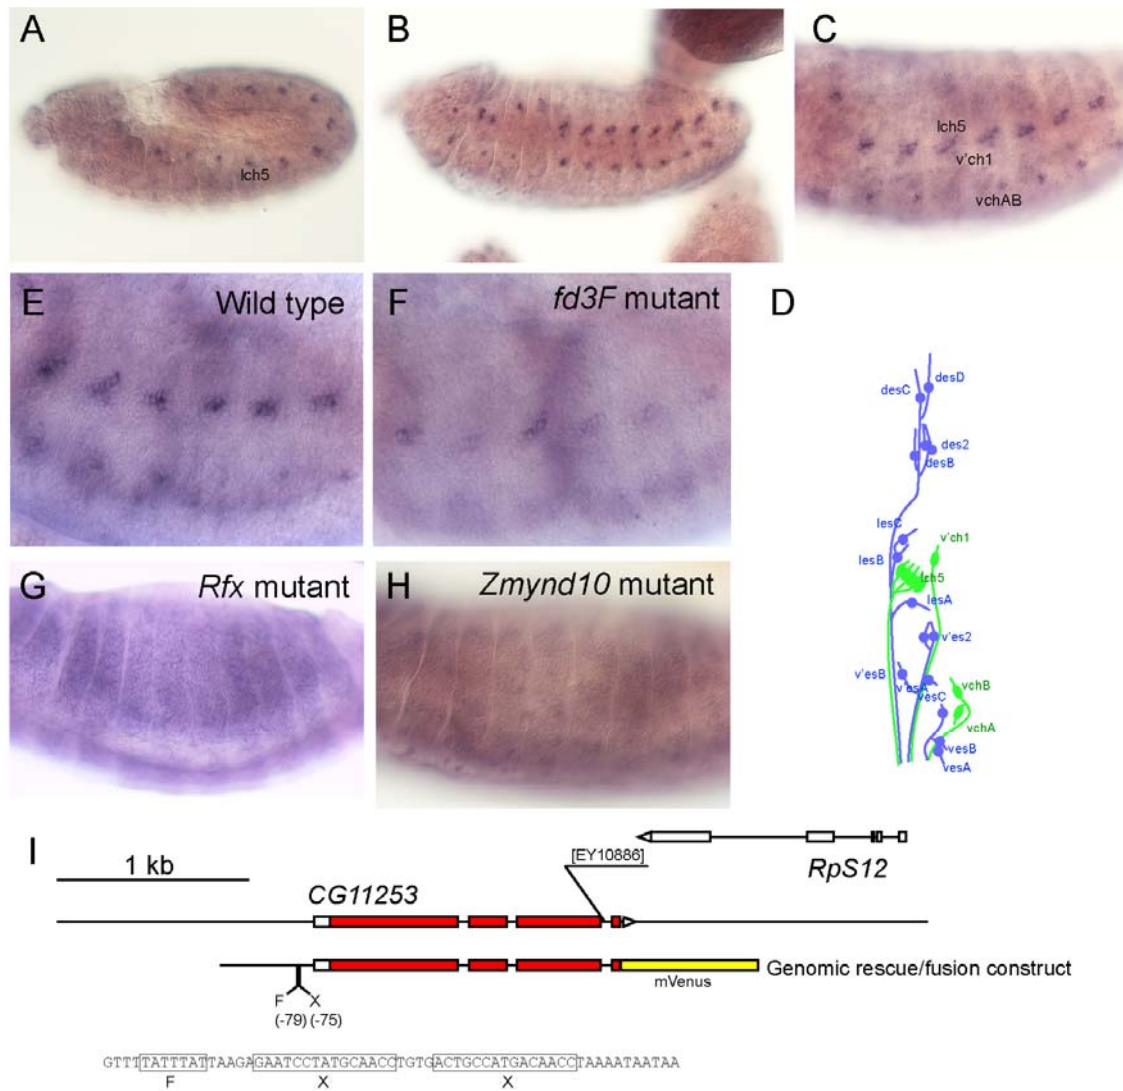

**Figure S5. Expression of *Drosophila Zmynd10* during normal development and in the mutant embryos described in the study**

(A–C) Developmental time-course of *Zmynd10* mRNA expression in stage 11 (A) and 14 (B and C) embryos, indicating positively stained sensory neurons.

(D) Schematic of the sensory neurons in an embryonic abdominal segment. Ch neurons are green.

(E–G) *Zmynd10* expression is reduced in *Rfx* and *fd3F* mutant embryos at stage 14.

(H) Expression is undetectable in embryos homozygous for the P element insertion, EY10886.

(I) Schematic of the *Zmynd10* locus showing gene structure, insertion site of the P element ('EY10886' insertion), and region used to construct the *Zmynd10-mVenus* fusion gene. The location of putative binding motifs for Rfx (X) and Fd3F (F) is shown. To create the fusion gene, primers 5'-

GGGGACAAGTTTGTACAAAAAAGCAGGCTCCTATAACACCTATTAGTTCTCAG-3'  
and 5'-  
GGGGACCACTTTGTACAAGAAAGCTGGGTCAGTTTAAAGGCAGACGAGCT-3'  
were used to amplify a fragment from fly genomic DNA that was cloned into pDonr221 then transferred to pBID-UASC-GV (Gateway technology, Invitrogen). Transformants were made by microinjection into syncytial blastoderm embryos.

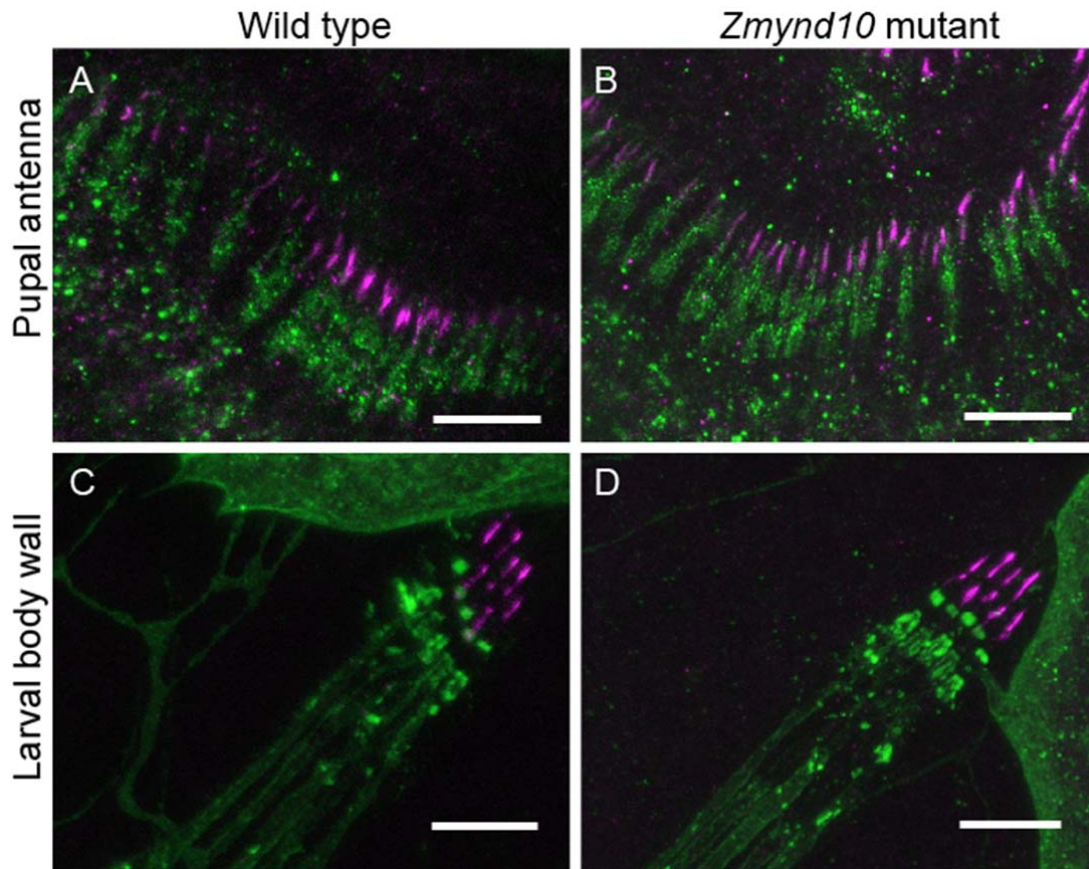

**Figure S6. Localization of NOMPC in *Zmynd10* Mutant Ch Neurons**

Localization of distal ciliary protein NOMPC (magenta) relative to anti-HRP immunoreactivity (green, labeling the neuronal dendritic outer segments) in Ch neurons in pupal antennae (A and B) and larval body wall (C and D). There is no gross difference in NOMPC distribution between wild-type (A and C) and *Zmynd10* mutant (B and D) tissues. Scale bars: 10  $\mu$ m



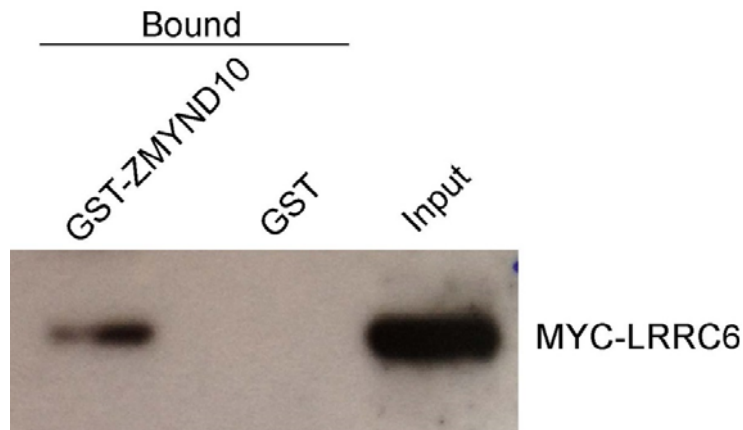

**Figure S7. LRRC6 Binds Specifically to ZMYND10 in a GST Pull-Down Assay**

MYC-tagged in vitro translated LRRC6 was subjected to GST pull-down assay using GST or GST-ZMYND10. A GST-ZMYND10 fusion protein (ORF cloned into the *EcoRI* site of pGEX-2T) was induced in *BL21(pLysS)* cells using 1 mM IPTG, and LRRC6 protein expressed from the yeast two-hybrid vector pGBKT7 using the TNT Quick Coupled Transcription/Translation System (Promega), resulting in LRRC6 protein with an N-terminal c-Myc epitope tag. The GST pulldown was carried out according to Nguyen, T.N. and Goodrich, J.A. (2006). Protein-protein interaction assays: eliminating false positive interactions. *Nature Methods* 3, 135–139. After electrophoresis of the washed GST samples alongside a sample of the MYC-LRRC6 protein (input), the Western blot was probed with anti-c-MYC antibody (1:4000, Sigma) as a primary antibody and anti-rabbit-HRP (1:10000, Jackson Laboratories) as a secondary. Detection performed using Amersham ECL Select Western blotting detection reagents (GE Healthcare).

**Table S1. Exome Sequencing Coverage and Mapping Statistics**

|                                   | <b>UCL-142 II:1</b> | <b>UCL-88 II:2</b> | <b>UCL-157 II:5</b> |
|-----------------------------------|---------------------|--------------------|---------------------|
| total_reads                       | 60061451            | 51249050           | 94486779            |
| mapped_to_target_reads            | 47443940            | 27636951           | 65894306            |
| percentage                        | 78.99               | 53.93              | 69.74               |
| mapped_to_target_reads_plus_150bp | 53550783            | 32502610           | 73656490            |
| percentage                        | 89.16               | 63.42              | 77.95               |
| mean_coverage                     | 81.25               | 49.46              | 122.23              |
| accessible_target_bases           | 33323618            | 33323618           | 33323618            |
| accessible_target_bases_1x        | 32934659            | 32643148           | 32765248            |
| percentage                        | 98.83               | 97.96              | 98.32               |
| accessible_target_bases_5x        | 31832799            | 31546980           | 32195792            |
| percentage                        | 95.53               | 94.67              | 96.62               |
| accessible_target_bases_10x       | 30717588            | 29846450           | 31598540            |
| percentage                        | 92.18               | 89.57              | 94.82               |
| target_bases_20x                  | 28784969            | 25414499           | 30102792            |
| percentage                        | 86.38               | 76.27              | 90.34               |

**Table S2. Variant Calling for Exome Sequenced Individuals**

| variant_type              | UCL-142 II:1 |       | UCL-88 II:2 |       | UCL-157 II:5 |       |
|---------------------------|--------------|-------|-------------|-------|--------------|-------|
|                           | known        | novel | known       | novel | known        | novel |
| variants                  | 23625        | 104   | 23135       | 153   | 24098        | 141   |
| het_variants              | 14357        | 101   | 14046       | 153   | 14368        | 138   |
| hom_variants              | 9268         | 3     | 9089        | 0     | 9730         | 3     |
| coding_variants           | 20914        | 95    | 20532       | 139   | 21256        | 120   |
| het_coding_variants       | 12745        | 92    | 12471       | 139   | 12690        | 118   |
| hom_coding_variants       | 8169         | 3     | 8061        | 0     | 8566         | 2     |
| splice_variants           | 2711         | 9     | 2603        | 14    | 2842         | 21    |
| het_splice_variants       | 1612         | 9     | 1575        | 14    | 1678         | 20    |
| hom_splice_variants       | 1099         | 0     | 1028        | 0     | 1164         | 1     |
| nonsynonymous_SNVs        | 9702         | 48    | 9435        | 86    | 9451         | 73    |
| het_nonsynonymous_SNVs    | 5938         | 47    | 5723        | 86    | 5658         | 73    |
| hom_nonsynonymous_SNVs    | 3764         | 1     | 3712        | 0     | 3793         | 0     |
| synonymous_SNVs           | 10644        | 35    | 10500       | 39    | 10833        | 33    |
| het_synonymous_SNVs       | 6498         | 35    | 6448        | 39    | 6480         | 32    |
| hom_synonymous_SNVs       | 4146         | 0     | 4052        | 0     | 4353         | 1     |
| stoploss_SNVs             | 51           | 0     | 42          | 1     | 12           | 0     |
| het_stoploss_SNVs         | 21           | 0     | 16          | 1     | 7            | 0     |
| hom_stoploss_SNVs         | 30           | 0     | 26          | 0     | 5            | 0     |
| stopgain_SNVs             | 86           | 2     | 74          | 3     | 70           | 0     |
| het_stopgain_SNVs         | 70           | 2     | 57          | 3     | 49           | 0     |
| hom_stopgain_SNVs         | 16           | 0     | 17          | 0     | 21           | 0     |
| deletions                 | 184          | 5     | 204         | 5     | 223          | 8     |
| het_deletions             | 111          | 4     | 104         | 5     | 135          | 7     |
| hom_deletions             | 73           | 1     | 100         | 0     | 88           | 1     |
| insertions                | 218          | 5     | 234         | 4     | 194          | 5     |
| het_insertions            | 80           | 4     | 102         | 4     | 100          | 5     |
| hom_insertions            | 138          | 1     | 132         | 0     | 94           | 0     |
| frameshift_deletions      | 65           | 4     | 67          | 3     | 82           | 3     |
| het_frameshift_deletions  | 37           | 3     | 24          | 3     | 46           | 3     |
| hom_frameshift_deletions  | 28           | 1     | 43          | 0     | 36           | 0     |
| frameshift_insertions     | 106          | 1     | 119         | 2     | 54           | 2     |
| het_frameshift_insertions | 24           | 1     | 30          | 2     | 22           | 2     |
| hom_frameshift_insertions | 82           | 0     | 89          | 0     | 32           | 0     |
| ts_tv_ratio               | 3.04         | 2.06  | 2.91        | 2.08  | 2.97         | 3.03  |
| het_ts_tv_ratio           | 3.06         | 2.03  | 2.95        | 2.08  | 2.98         | 3     |
| hom_ts_tv_ratio           | 3.01         | n/a   | 2.85        | n/a   | 2.95         | n/a   |

**Table S3. Summary of Whole Exome Filtering Process**

|                                                                                 | <b>UCL-142 II:1</b>  | <b>UCL-88 II:2</b>   | <b>UCL-157 II:5</b>  |
|---------------------------------------------------------------------------------|----------------------|----------------------|----------------------|
| Total variants                                                                  | 23729                | 23288                | 24228                |
| Variants in MAF<0.01 in 1000 Genomes                                            | 2698                 | 2309                 | 2411                 |
|                                                                                 |                      |                      |                      |
| Heterozygous                                                                    | 2085                 | 1849                 | 1849                 |
| Heterozygous nonsynonymous, splice-site, or insertion/deletion variants         | 1477                 | 1363                 | 1372                 |
| Heterozygous variants MAF<0.01 in 1000 Genomes, and 700 in-house non-PCD exomes | 308                  | 396                  | 365                  |
| Genes with compound heterozygous variants                                       | 13                   | 16                   | 6                    |
| Genes in CILBD (Ross <i>et al.</i> , 2007)                                      | 0                    | 1 ( <i>ZMYND10</i> ) | 0                    |
|                                                                                 |                      |                      |                      |
| Homozygous                                                                      | 613                  | 460                  | 562                  |
| Homozygous nonsynonymous, splice-site, or insertion/deletion variants           | 527                  | 426                  | 508                  |
| Homozygous variants MAF<0.01 in 1000 Genomes, and 700 in-house non-PCD exomes   | 10                   | 5                    | 18                   |
| Genes in CILDB (Ross <i>et al.</i> , 2007)                                      | 1 ( <i>ZMYND10</i> ) | 0                    | 1 ( <i>ZMYND10</i> ) |

**Table S4. Exome Sequencing Data for Family GVA-09**

|                         | GVA-09 II:1 (affected) |            |                  |            | GVA-09 II:2 (affected) |            |                  |            | GVA-09 II:3 (unaffected) |            |                  |            |
|-------------------------|------------------------|------------|------------------|------------|------------------------|------------|------------------|------------|--------------------------|------------|------------------|------------|
|                         | variants               | % in exons | present in dbSNP | % in dbSNP | variants               | % in exons | present in dbSNP | % in dbSNP | variants                 | % in exons | present in dbSNP | % in dbSNP |
| synonymous SNV          | 10155                  | 50.98%     | 10095            | 99.41%     | 10468                  | 50.92%     | 10405            | 99.40%     | 10306                    | 51.22%     | 10242            | 99.38%     |
| missense SNV            | 8947                   | 44.92%     | 8851             | 98.93%     | 9186                   | 44.68%     | 9092             | 98.98%     | 8968                     | 44.57%     | 8870             | 98.91%     |
| nonsense SNV            | 73                     | 0.37%      | 68               | 93.15%     | 73                     | 0.36%      | 65               | 89.04%     | 65                       | 0.32%      | 61               | 93.85%     |
| stoploss SNV            | 18                     | 0.09%      | 16               | 88.89%     | 22                     | 0.11%      | 20               | 90.91%     | 19                       | 0.09%      | 18               | 94.74%     |
| frameshift indels       | 118                    | 0.59%      | 30               | 66.90%     | 145                    | 0.71%      | 39               | 72.60%     | 138                      | 0.69%      | 35               | 77.05%     |
| nonframeshift indels    | 175                    | 0.88%      | 72               | 86.29%     | 201                    | 0.98%      | 88               | 94.47%     | 171                      | 0.85%      | 67               | 83.06%     |
| uncertain annotation    | 433                    | 2.17%      | 407              | 94.00%     | 463                    | 2.25%      | 435              | 93.95%     | 453                      | 2.25%      | 425              | 93.82%     |
| total exonic            | 19919                  | 100.00%    | 19539            |            | 20558                  | 100.00%    | 20144            |            | 20120                    | 100.00%    | 19718            |            |
| splicing ( $\pm 10$ bp) | 2812                   |            | 2393             | 85.10%     | 3022                   |            | 2498             | 82.66%     | 2846                     |            | 2402             | 84.40%     |
| total (exonic+splicing) | 22731                  |            | 21932            |            | 23580                  |            | 22642            |            | 22966                    |            | 22120            |            |

|                    | GVA-09 II:1 | GVA-09 II:2 | GVA-09 II:3 |
|--------------------|-------------|-------------|-------------|
| Number of reads    |             |             |             |
| total              | 157304542   | 190680200   | 169255446   |
| rmdup              | 123009073   | 157720954   | 144383524   |
| on target          | 67897700    | 82965171    | 76829774    |
| coverage           |             |             |             |
| average            | 115.8       | 155.1       | 145         |
| % of reads covered |             |             |             |
| 8x                 | 92.92%      | 94.96%      | 94.14%      |
| 10x                | 91.57%      | 93.96%      | 93.01%      |

**Table S5. Summary of Whole Exome Filtering Process for GVA-09 Family**

| <b>Filtering steps</b>                                                                                                                                                                                            | <b>Number of genes remaining</b> |
|-------------------------------------------------------------------------------------------------------------------------------------------------------------------------------------------------------------------|----------------------------------|
| Genes after filtration by VariantMaster (respecting autosomal recessive heredity, filtering out low quality variants, synonymous variants, variants with frequency > 0.01 and variants in segmental duplications) | 10                               |
| Genes not found in the laboratory's database of exome variants                                                                                                                                                    | 5                                |
| Filtering out genes causing known disorders with phenotypes unrelated to the patient's clinical description                                                                                                       | 3                                |
| Genes without false positive calls                                                                                                                                                                                | 2                                |
| Genes with variants predicted pathogenic by SIFT, PolyPhen2, MutationTaster                                                                                                                                       | 1 ( <i>ZMYND10</i> )             |

The annotated list of variants and the mapped reads files (.bam) were input for VariantMaster (submitted), a software testing for heredity and call accuracy. Variants selected were consistent for recessive inheritance (homozygous, compound heterozygotes) in the three siblings (two affected, one unaffected), and met the selected quality control threshold (score of 50 for SNVs called by SAMtools and score of 600 for indels called by Pindel). Variants in segmental duplications, synonymous variants and variants with MAF > 0.01 in dbSNP, Exome Variant Server or 1000Genomes project were excluded.

**Table S6. Mutational Analysis and Clinical Symptoms of ZMYND10 Patients**

| Patient (Method)                 | Mutations                                               | Age at diagnosis | Sex | Origin                                        | EM findings                               | Situs                                                                            | Perinatal respiratory symptoms                              | Nasal NO                      | Light microscopy                                 | Respiratory disease                | Documented bronchiectasis                                          | Rhino-sino disease                 | Otitis media                                                                                   | Subfertility                 |
|----------------------------------|---------------------------------------------------------|------------------|-----|-----------------------------------------------|-------------------------------------------|----------------------------------------------------------------------------------|-------------------------------------------------------------|-------------------------------|--------------------------------------------------|------------------------------------|--------------------------------------------------------------------|------------------------------------|------------------------------------------------------------------------------------------------|------------------------------|
| UCL-142 II:1 (WES)               | c.47T>G (p.Val16Gly)                                    | 8 y              | F   | N. European                                   | Reduced IDA+ODA                           | Situs solitus                                                                    | Recurrent respiratory infections from birth                 | 23 ppb                        | Slowed frequency, asynchronous (stiff)           | Chronic cough with purulent sputum | Multiple on HRCT, incl. chronic right middle lung lobe atelectasis | Persistent rhinitis and rhinorrhea | Frequent in childhood, repeated grommet insertions, alternating hearing loss during infections | Yes, IVF program planned     |
| UCL-88 II:2 (WES)                | c.47T>G (p.Val16Gly); c.589_590delTG (p.Val198Glyfs*13) | 2 y              | F   | N. European                                   | Absent IDA+ODA                            | Dextrocardia                                                                     | Respiratory distress at birth                               | NA                            | Static cilia                                     | Chronic cough with purulent sputum | Yes                                                                | Persistent                         | Glue ear, grommet insertions                                                                   | Unknown                      |
| GVA-09 II:1 (SS, WES)            | c.797T>C (p.Leu266Pro)                                  | NA               | F   | N. European                                   | Absent IDA+ODA                            | Complete situs inversus                                                          | NA                                                          | NA                            | Motility defect document                         | Recurrent infections and pneumonia | NA                                                                 | Nasal polyps                       | NA                                                                                             | Had IVF                      |
| GVA-09 II:2 (SS, WES)            | c.797T>C (p.Leu266Pro)                                  | NA               | F   | N. European                                   | Absent IDA+ODA                            | Situs solitus                                                                    | NA                                                          | NA                            | Motility defect document                         | Recurrent infections and pneumonia | NA                                                                 | NA                                 | NA                                                                                             | NA                           |
| UCL-157 II:3 (ND)                | ND                                                      | NA               | M   | N. European (1 <sup>st</sup> cousin marriage) | NA                                        | Complete situs inversus                                                          | NA                                                          | NA                            | NA                                               | NA                                 | NA                                                                 | NA                                 | NA                                                                                             | NA                           |
| UCL-157 II:4 (SS)                | c.47T>G (p.Val16Gly)                                    | NA               | F   | N. European (1 <sup>st</sup> cousin marriage) | Reduced IDA+ODA, with reduced arm lengths | Situs solitus                                                                    | NA                                                          | NA                            | Static cilia documented                          | NA                                 | NA                                                                 | NA                                 | NA                                                                                             | NA                           |
| UCL-157 II:5 (WES)               | c.47T>G (p.Val16Gly)                                    | NA               | F   | N. European (1 <sup>st</sup> cousin marriage) | Reduced IDA+ODA, with reduced arm lengths | Situs solitus                                                                    | NA                                                          | NA                            | Motility defect, labelled 'normal' after culture | NA                                 | NA                                                                 | NA                                 | NA                                                                                             | NA                           |
| UCL226 II:2 (SS)                 | c.65delT (p.Phe22Serfs*21)                              | 4 mo             | F   | Pakistani (1 <sup>st</sup> cousin marriage)   | Absent IDA+ODA                            | Complete situs inversus                                                          | Respiratory distress from birth                             | NA (too young when diagnosed) | Static cilia                                     | Chronic cough with purulent sputum | NA                                                                 | Persistent                         | Glue ear and mild hearing loss                                                                 | Unknown (paediatric)         |
| UCL226 II:4 (ND)                 | ND                                                      | 3 mo             | F   | Pakistani (1 <sup>st</sup> cousin marriage)   | Absent IDA+ODA                            | Complete situs inversus                                                          | Respiratory distress from birth                             | NA -Too young                 | Static cilia                                     | Cough                              | NA                                                                 | Persistent rhinitis                | neonatal hearing test normal                                                                   | Unknown (paediatric patient) |
| UCL-233 II:1 (Sanger sequencing) | c.47T>G (p.Val16Gly); c.116T>C (p.Leu39Pro)             | 3 y              | M   | N. European                                   | Absent or short IDA+ODA                   | Dextrocardia with unusual atrial arrangement, and complex cyanotic heart disease | Complex cyanotic cardiac disease-respiratory status unclear | 32 ppb                        | Static cilia                                     | Chronic cough with purulent sputum | No, but no HRCT performed                                          | Persistent                         | Bilateral effusions with hearing impairment                                                    | Unknown                      |

WES, whole exome sequencing; SS, Sanger sequencing; ND, not sequenced; NA, information not available; IVF, in vitro fertilisation assistance used.

**Table S7. Frequency of Visible Dynein Arms in *Drosophila Zmynd10* Mutant**

| Presence of: | Revertant<br>(n=45) | Mutant<br>(n=81) | <i>P</i> (Fisher<br>exact test) |
|--------------|---------------------|------------------|---------------------------------|
| ODA          | 93.3%               | 53.1%            | <0.0001                         |
| IDA          | 86.7%               | 21.0%            | <0.0001                         |

Key: n = number of doublets scored.



**Table S8. WES-Derived Haplotype Analysis across the *ZMYND10* p.Val16Gly Mutation**

| Chrom | Position | dbSNP ID           | 1000G MAF | Gene           | Reference | Family haplotypes |      |         |      |        |       |
|-------|----------|--------------------|-----------|----------------|-----------|-------------------|------|---------|------|--------|-------|
|       |          |                    |           |                |           | UCL-157           |      | UCL-142 |      | UCL-88 |       |
|       |          |                    |           |                |           | Mat               | Pat  | Mat     | Pat  | Mat    | Pat   |
| chr3  | 49949071 | <i>rs868891</i>    | 0.2784    | <i>MON1A</i>   | A         | G                 | G    | G       | G    | G      | G     |
| chr3  | 50251835 | -                  | -         | <i>SLC38A3</i> | -         | insG              | insG | insG    | insG | -      | -     |
| chr3  | 50306757 | -                  | -         | <i>SEMA3B</i>  | -         | insC              | insC | -       | -    | insC   | insC  |
| chr3  | 50329826 | <i>rs1076872</i>   | 0.7801    | <i>IFRD2</i>   | A         | G                 | G    | G       | G    | G      | G     |
| chr3  | 50332697 | <i>rs13100173</i>  | 0.2679    | <i>HYAL3</i>   | G         | A                 | A    | A       | A    | A      | A     |
| chr3  | 50357869 | <i>rs709210</i>    | 0.7736    | <i>HYAL2</i>   | A         | C                 | C    | C       | C    | C      | C     |
| chr3  | 50380558 | -                  | -         | <i>ZMYND10</i> | CA        | CA                | CA   | CA      | CA   | CA     | delCA |
| chr3  | 50382964 | <i>rs138815960</i> | -         | <i>ZMYND10</i> | A         | C                 | C    | C       | C    | C      | A     |
| chr3  | 50597092 | <i>rs1034405</i>   | 0.8252    | <i>C3orf18</i> | G         | A                 | A    | A       | A    | A      | A     |
| chr3  | 50609624 | <i>rs2232248</i>   | 0.7257    | <i>HEMK1</i>   | T         | G                 | G    | G       | G    | G      | G     |
| chr3  | 51273773 | <i>rs1480361</i>   | 0.994     | <i>DOCK3</i>   | T         | C                 | C    | C       | C    | C      | C     |
| chr3  | 51812952 | <i>rs11130296</i>  | 0.162     | <i>IQCF6</i>   | C         | T                 | T    | T       | T    | T      | C     |
| chr3  | 51929096 | <i>rs114559032</i> | 0.0051    | <i>IQCF1</i>   | C         | C                 | C    | C       | C    | C      | T     |
| chr3  | 51929183 | <i>rs11927897</i>  | 0.0197    | <i>IQCF1</i>   | C         | C                 | C    | C       | C    | C      | T     |
| chr3  | 51978220 | <i>rs28547534</i>  | 0.9951    | <i>PARP3</i>   | A         | G                 | G    | G       | G    | G      | G     |
| chr3  | 51990119 | -                  | 0.9956    | <i>GPR62</i>   | A         | C                 | C    | G       | G    | C      | C     |

Haplotype information on common SNPs across the *ZMYND10* was derived from whole exome sequencing data in three available families carrying the p.Val16Gly missense variant, UCL-157 and UCL-142 homozygous for the variant, and UCL-88 compound heterozygous for p.Val16Gly missense (maternally inherited) and c.589\_590delTG (paternally inherited, called ‘delCA’ here since calls for *ZMYND10* are from the reverse strand). Parental phase is defined in Figure 1, main paper. A common 1.6Mb haplotype carrying the p.Val16Gly missense change (c.47T>G, rs138815960) can be defined, shared across the three patients (shown by red border). However, the markers within this haplotype are mostly uninformative, as seen by comparison to the paternal haplotype carrying the c.589\_590delTG *ZMYND10* mutation in UCL-88 (far right column). Five SNP markers surrounding the two *ZMYND10* mutations (indicated in grey) are uninformative.
